# Supplementary material for: Using a Simple Magnetic Adsorbent for the Preconcentration and Determination of Ga(III) and In(III) by Electrothermal Atomic Absorption Spectrometry
Source: MDPI journal article supplement (doi:10.3390/molecules28062549), 2023-03-10
Supplement: s1 [file s1]

# Using a simple magnetic adsorbent for the preconcentration and determination of Ga(III) and In(III) by electrothermal atomic absorption spectrometry

Yesica Vicente-Martínez, María José Muñoz-Sandoval, Manuel Hernández-Córdoba and Ignacio López-García

*Department of Analytical Chemistry, Faculty of Chemistry, Regional Campus of International Excellence "Campus Mare Nostrum", University of Murcia, 30100-Murcia, Spain*

**Supplementary material**

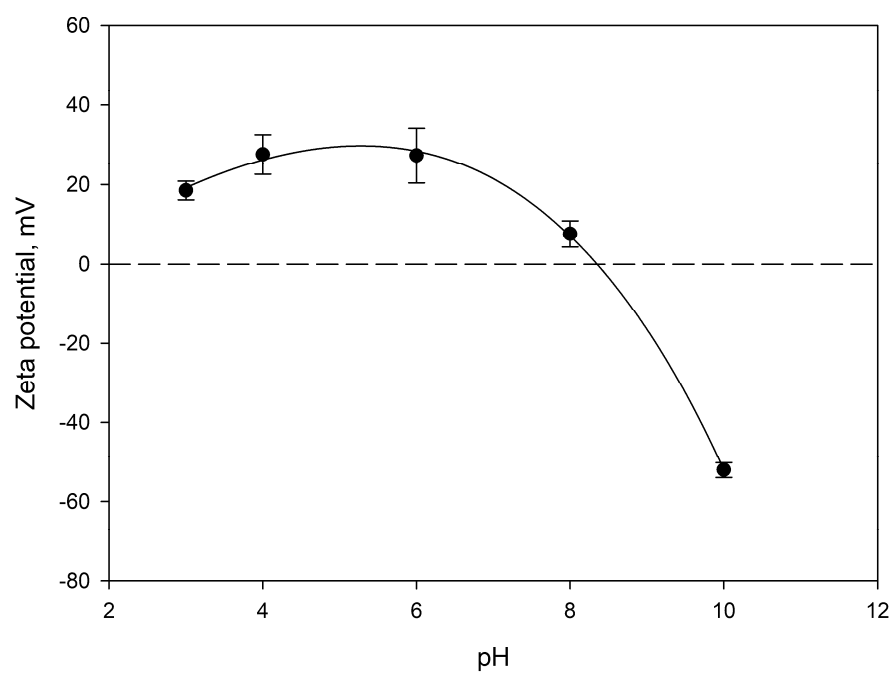

**Figure S1.** Zeta potential of ferrite particles synthesized as indicated in Experimental measured with dynamic light scattering (DLS).

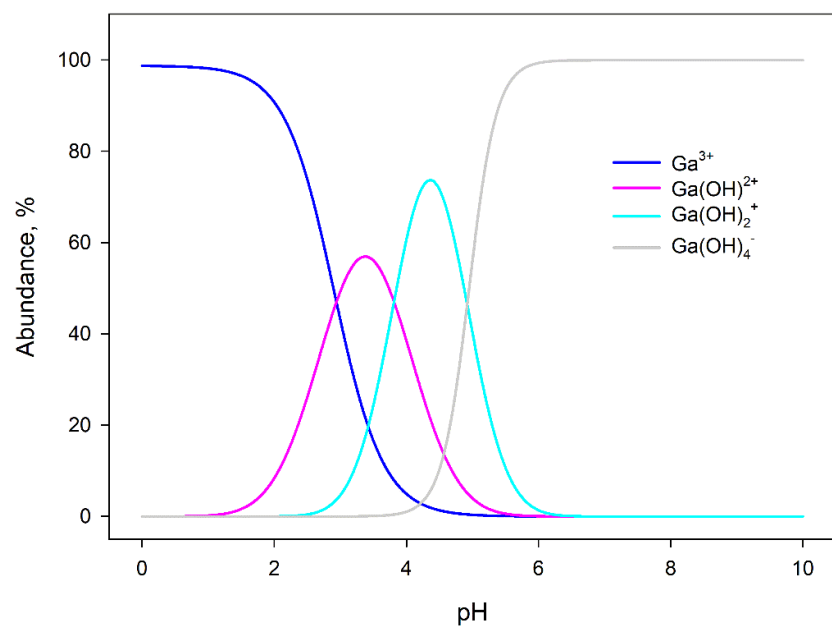

**Figure S2:** Distribution diagram of the hydrolysed forms of Ga(III) considering the polynuclear species, adapted from [1].

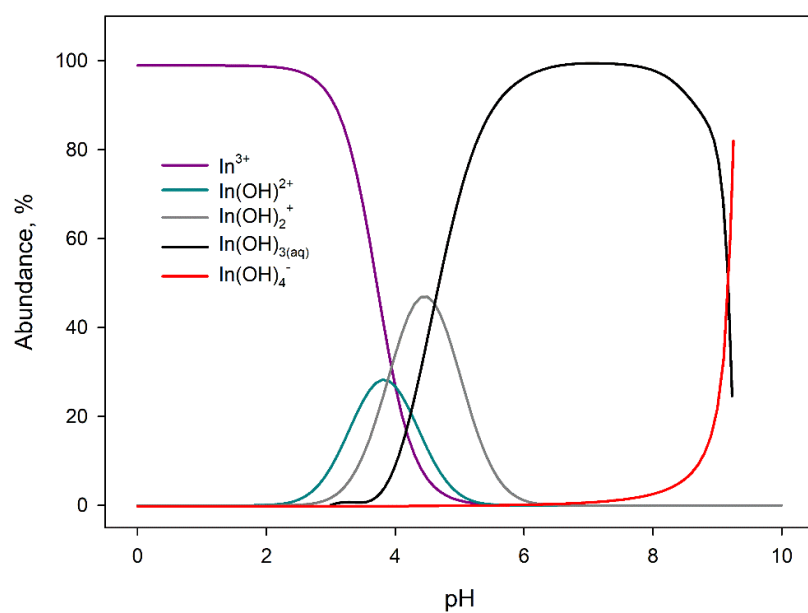

**Figure S3:** Distribution diagram for hydrolysed forms of In(III), adapted from [2].

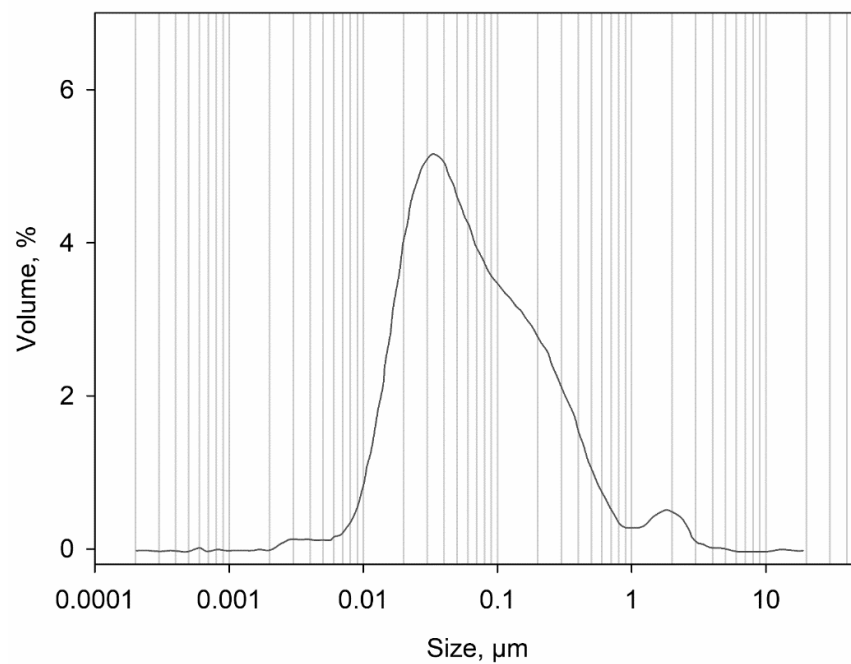

**Figure S4.** Dynamic Light Scattering (DSL) particle size distribution analysis obtained from ferrite particles synthesized as indicated in the work.

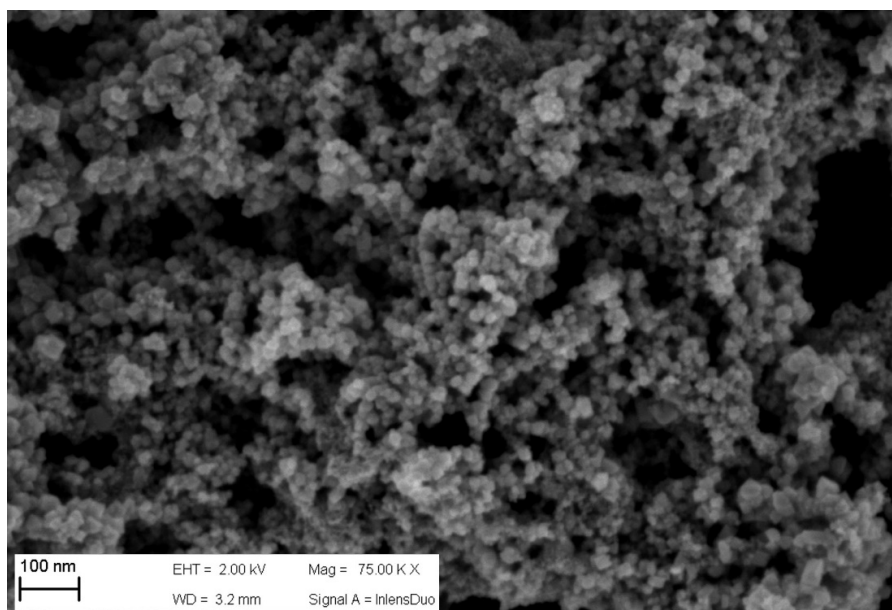

**Figure S5.** FESEM image for Fe<sub>3</sub>O<sub>4</sub> .

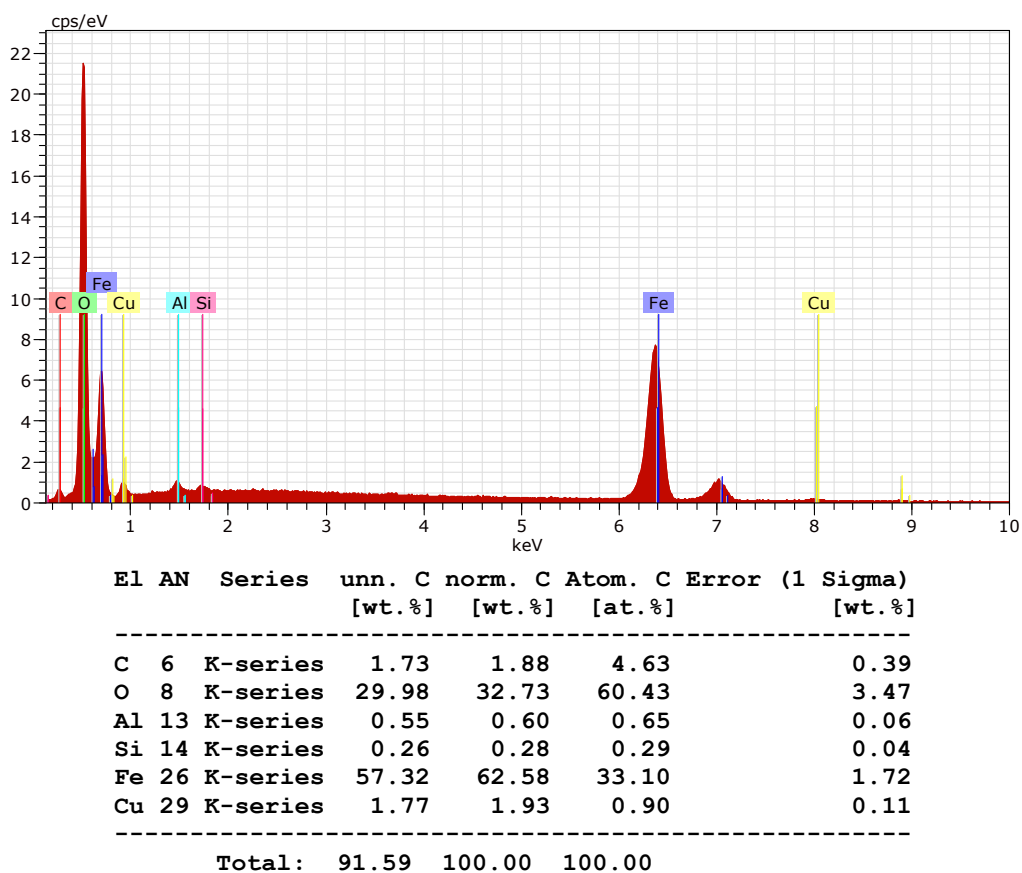

**Figure S6.** EDX spectra and atomic concentration tables corresponding to the area shows in Figure S5, for Fe<sub>3</sub>O<sub>4</sub>.

## Reference

1. Hacht, B. Gallium(III) ion hydrolysis under physiological conditions. *Bull. Korean Chem. Soc.* 2008, 29, 372–376.
2. Wood, S.A.; Samson, I.M. The aqueous geochemistry of gallium, germanium, indium and scandium, *Ore Geol. Rev.* **2006**, 28, 57–102. <https://doi.org/10.1016/j.oregeorev.2003.06.002>.
